# Supplementary material
Source: PubMed Central journal article supplement (PMC6822120)
Supplement: ao9b02579_si_001.pdf [file ao9b02579_si_001.pdf]

# Polyamine-Modified Gold Nanoparticles Readily Adsorb on Cell Membranes for Bioimaging

Xiang-Fu Du, Bing-Jie Zhu, Zhong-Chao Cai, Chaojie Wang, and Mei-Xia Zhao\*

Key Laboratory of Natural Medicine and Immune Engineering, Henan University, Kaifeng, 475004, China.

\* Corresponding author. E-mail address: zhaomeixia2011@henu.edu.cn

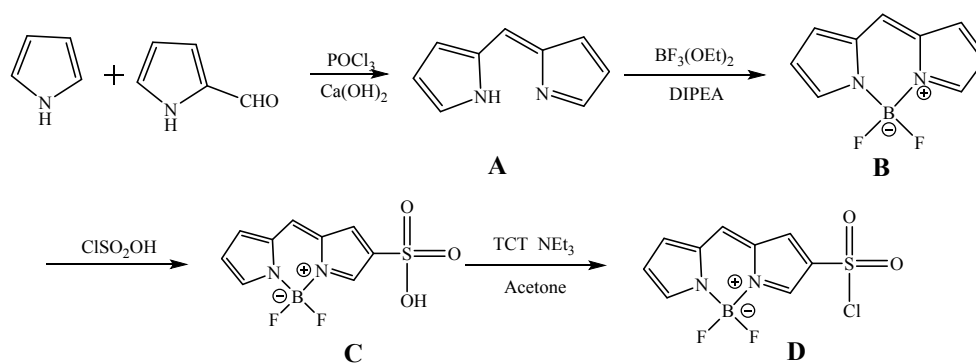

Scheme S1. Schematic illustration of the synthesis of BODIPY-SO<sub>2</sub>Cl.

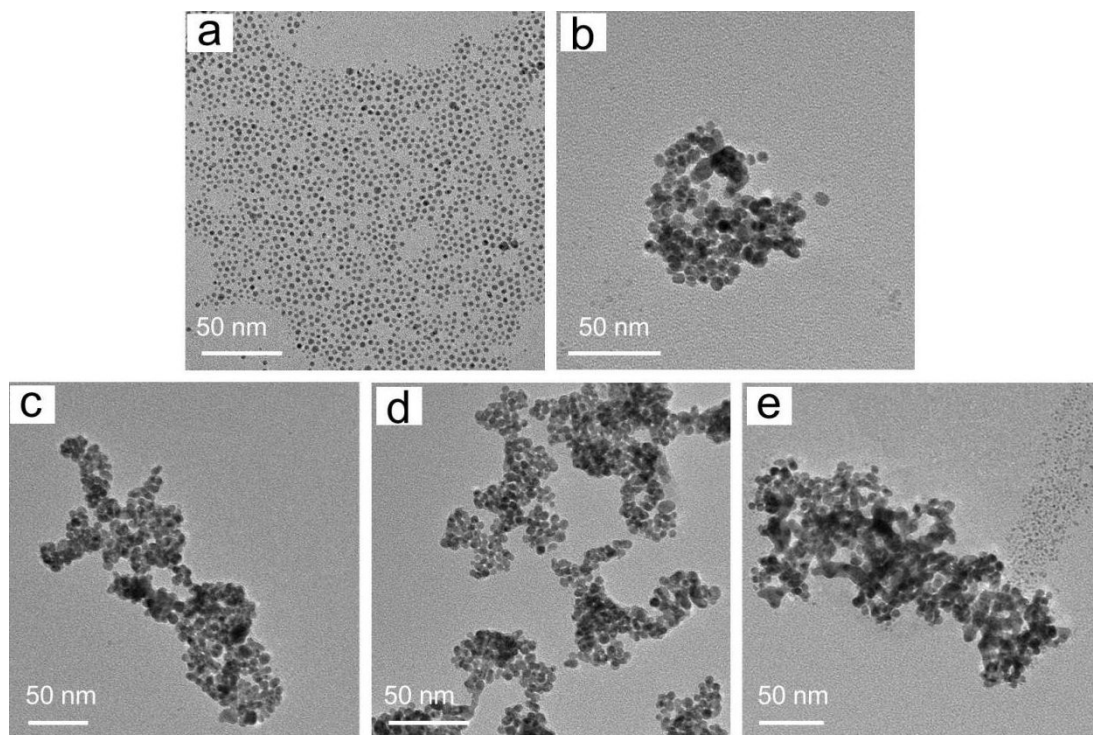

Figure S1. TEM images of gold nanoparticles. (a) AuNP@MPA; (b) AuNP@MPA-Trp-4C-FITC; (c) AuNP@MPA-Lys-4C-FITC; (d) AuNP@MPA-Cys-4C-FITC; (e) AuNP@MPA-Glu-4C-FITC. (Scale bars: 50 nm).

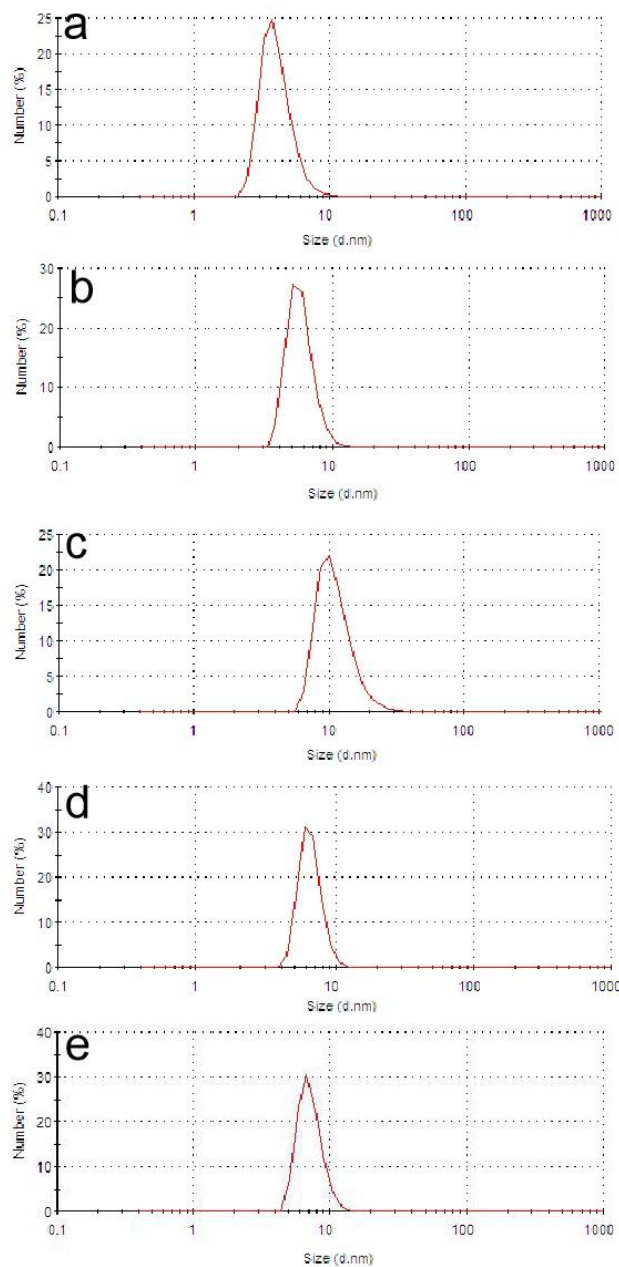

Figure S2. DLS particle size distributions of gold nanoparticles. (a) AuNP@MPA; (b) AuNP@MPA-Trp-4C-FITC; (c) AuNP@MPA-Lys-4C-FITC; (d) AuNP@MPA-Cys-4C-FITC; (e) AuNP@MPA-Glu-4C-FITC.

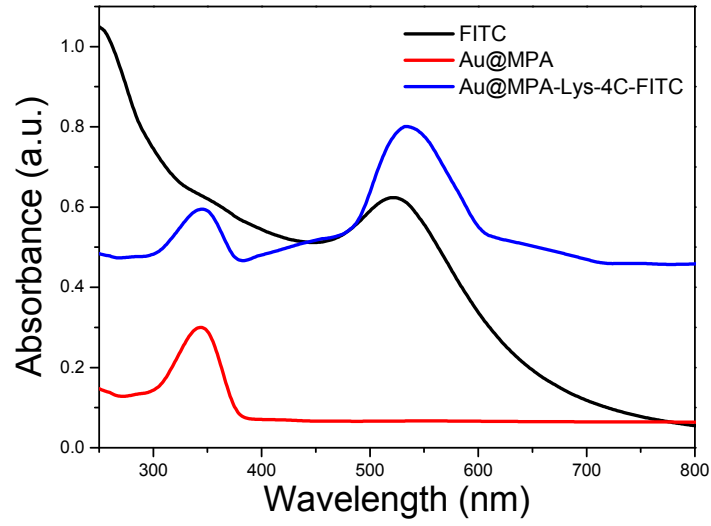

Figure S3. UV-Vis absorption spectra of FITC; AuNP@MPA; AuNP@MPA-Lys-4C-FITC.

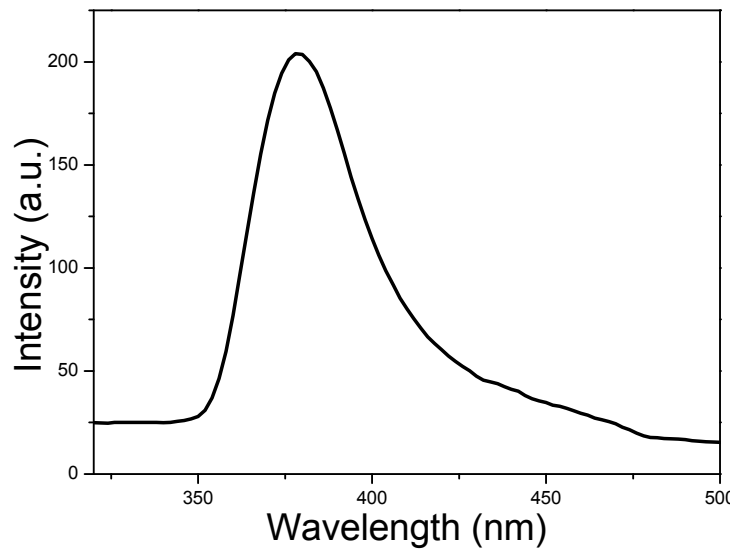

Figure S4. The fluorescence spectra of AuNP@MPA.

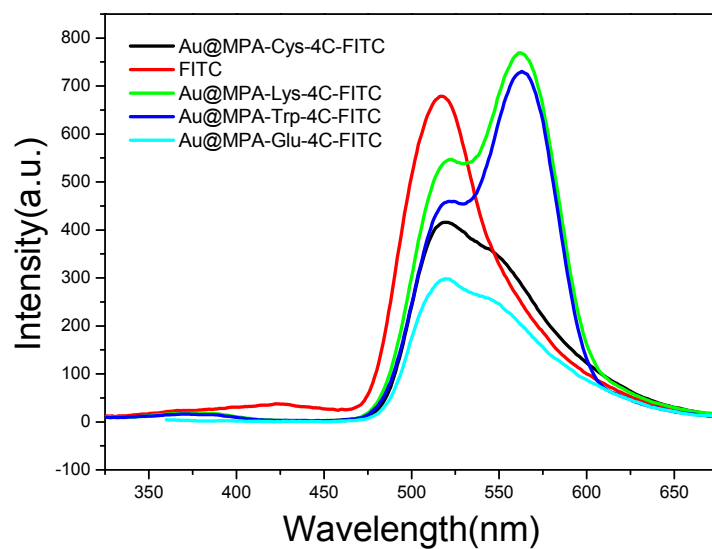

Figure S5. The fluorescence spectra of FITC; AuNP@MPA-Trp-4C-FITC; AuNP@MPA-Lys-4C-FITC; AuNP@MPA-Cys-4C-FITC; AuNP@MPA-Glu-4C-FITC.

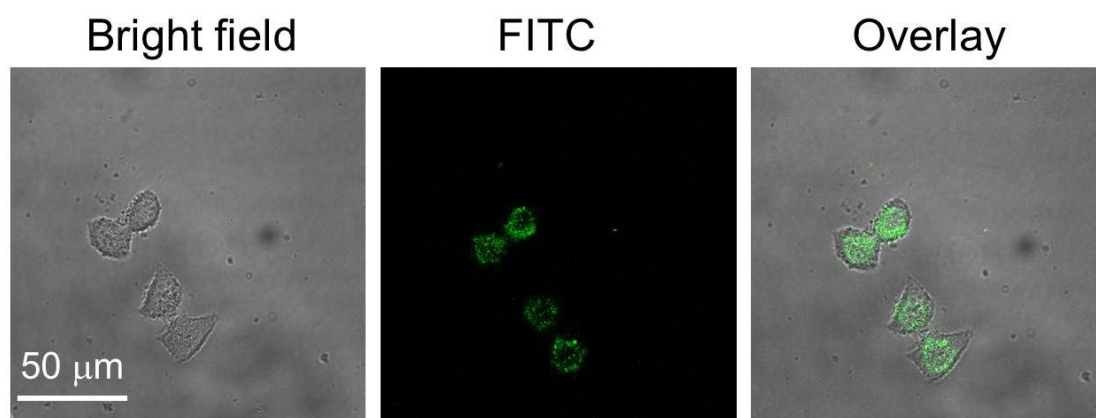

Figure S6. Confocal images of HepG2 cells treated with FITC (0.65 μM) for 10 min at 37 °C.
